# Supplementary material
Source: PubMed Central journal article supplement (PMC7863650)
Supplement: CJN.09140620SupplementaryData.pdf [file CJN.09140620SupplementaryData.pdf]

## Supplemental Material

### 1. Table of contents

- a. **Supplemental Table 1:** Characteristics of patients with incident kidney failure (2005-2017) by sex
- b. **Supplemental Table 2:** Characteristics of all waitlisted patients by sex and attributed cause of kidney failure
- c. **Supplemental Table 3:** Hazard of deceased donor transplantation from waitlisting by sex
- d. **Supplemental Table 4:** Access to waitlist and deceased donor transplantation by sex after first kidney replacement therapy with competing risk of death and living donor kidney transplantation
- e. **Supplemental Table 5:** Access to deceased donor transplantation after waitlisting by sex with competing risk of death and living donor kidney transplantation
- f. **Supplemental Table 6:** Hazard of waitlisting and deceased donor transplantation after first kidney replacement therapy by sex, age, and attributed cause of kidney failure
- g. **Supplemental Table 7:** Hazard of waitlisting and deceased donor transplantation by sex after first maintenance kidney replacement therapy excluding those placed on waitlist before first maintenance kidney replacement therapy

**Supplemental Table 1:** Characteristics of patients with incident kidney failure (2005-2017) by sex

|                                                                              | Total cohort (N=1,478,037) |                   |
|------------------------------------------------------------------------------|----------------------------|-------------------|
|                                                                              | Men (N=843,132)            | Women (N=634,905) |
| Median Age in years (IQR) <sup>†</sup>                                       | 64 (53-74)                 | 65 (54-75)        |
| Race % <sup>†</sup>                                                          |                            |                   |
| Non-Hispanic White                                                           | 55                         | 51                |
| Non-Hispanic Black                                                           | 24                         | 30                |
| Hispanic                                                                     | 15                         | 14                |
| Other                                                                        | 5                          | 6                 |
| Attributed Cause of kidney failure % <sup>†</sup>                            |                            |                   |
| Type 2 diabetes                                                              | 41                         | 43                |
| Type 1 diabetes                                                              | 4                          | 4                 |
| Hypertension                                                                 | 29                         | 27                |
| Cystic disease                                                               | 2                          | 2                 |
| Glomerulonephritis                                                           | 8                          | 8                 |
| Other                                                                        | 16                         | 15                |
| Median income <sup>1</sup> , \$1000s (IQR) <sup>†</sup>                      | 47.7 (37.8-62.2)           | 46.2 (36.7-59.4)  |
| Insurance <sup>2</sup> , % <sup>†</sup>                                      |                            |                   |
| Medicare                                                                     | 59                         | 61                |
| Medicaid                                                                     | 11                         | 14                |
| None                                                                         | 7                          | 5                 |
| Other                                                                        | 23                         | 19                |
| BMI <sup>3</sup> (IQR) <sup>†</sup>                                          | 27.4 (23.7-32.2)           | 28.5 (23.7-34.9)  |
| Diabetes <sup>4</sup> , % <sup>†</sup>                                       | 59                         | 62                |
| COPD <sup>4</sup> , % <sup>†</sup>                                           | 9                          | 9                 |
| Smoker <sup>4</sup> , % <sup>†</sup>                                         | 7                          | 5                 |
| Cancer <sup>4</sup> , % <sup>†</sup>                                         | 8                          | 6                 |
| Number of cardiovascular comorbidities <sup>4</sup> . mean ± SD <sup>†</sup> | 0.71 ± 0.93                | 0.68 ± 0.90       |

BMI, Body Mass Index; IQR, interquartile range; SD standard deviation

<sup>1</sup> 37,848 missing income

<sup>2</sup> 11,240 missing insurance coverage

<sup>3</sup> 11,332 missing BMI

<sup>4</sup> 28,599 missing one or more comorbidity data point

<sup>†</sup> p<0.001 for differences between men versus women

\*Cardiovascular comorbidities included Coronary Artery Disease, Congestive Heart Failure, Stroke or Transient Ischemic Attack, and Peripheral Vascular Disease

**Supplemental Table 2:** Characteristics of all waitlisted patients by sex and attributed cause of kidney failure

|                                                                             |       | All waitlisted Patients | Type 2 Diabetes  | Type 1 Diabetes  | Hypertension     | GN               | Cystic disease   | Other            |
|-----------------------------------------------------------------------------|-------|-------------------------|------------------|------------------|------------------|------------------|------------------|------------------|
| Total (N)                                                                   | Men   | 167,519                 | 58,241           | 11,266           | 40,756           | 27,392           | 10,769           | 19,095           |
|                                                                             | Women | 103,592                 | 29,711           | 7,802            | 21,708           | 21,842           | 9,302            | 13,227           |
| Median age at waitlisting (IQR) <sup>1</sup>                                | Men   | 54 (44-62)              | 58 (50-64)       | 45 (37-54)       | 54 (43-63)       | 47 (35-58)       | 51 (45-59)       | 53 (37-63)       |
|                                                                             | Women | 53 (42-61)              | 58 (50-64)       | 42 (34-52)       | 56 (45-64)       | 44 (33-56)       | 53 (46-60)       | 52 (39-62)       |
| Race/ethnicity <sup>†</sup> , % <sup>2</sup>                                |       |                         |                  |                  |                  |                  |                  |                  |
| Non-Hispanic White                                                          | Men   | 49                      | 40               | 63               | 37               | 57               | 77               | 65               |
|                                                                             | Women | 45                      | 34               | 60               | 34               | 43               | 74               | 64               |
| Non-Hispanic Black                                                          | Men   | 26                      | 24               | 19               | 42               | 20               | 9                | 17               |
|                                                                             | Women | 29                      | 33               | 23               | 45               | 28               | 12               | 16               |
| Hispanic                                                                    | Men   | 18                      | 26               | 15               | 15               | 15               | 10               | 13               |
|                                                                             | Women | 17                      | 24               | 13               | 14               | 18               | 10               | 13               |
| Other                                                                       | Men   | 7                       | 10               | 3                | 6                | 9                | 4                | 6                |
|                                                                             | Women | 8                       | 9                | 4                | 8                | 11               | 4                | 7                |
| Median Income, \$1,000s (IQR) <sup>3</sup>                                  | Men   | 51.0 (39.9-67.4)        | 50.0 (39.0-65.9) | 50.4 (40.2-65.3) | 48.9 (37.8-65.0) | 53.2 (41.9-69.5) | 55.7 (43.9-72.8) | 53.2 (42.0-70.1) |
|                                                                             | Women | 49.6 (38.8-65.0)        | 47.2 (37.0-61.1) | 50.1 (39.8-65.0) | 47.4 (36.8-61.9) | 51.3 (40.2-67.5) | 54.4 (43.0-71.6) | 52.3 (41.6-68.5) |
| Insurance Coverage <sup>†</sup> , % <sup>4</sup>                            |       |                         |                  |                  |                  |                  |                  |                  |
| Medicare                                                                    | Men   | 30                      | 37               | 27               | 30               | 21               | 21               | 31               |
|                                                                             | Women | 30                      | 37               | 27               | 32               | 20               | 23               | 31               |
| Medicaid                                                                    | Men   | 12                      | 12               | 14               | 12               | 10               | 6                | 12               |
|                                                                             | Women | 15                      | 16               | 19               | 16               | 17               | 8                | 14               |
| Other                                                                       | Men   | 49                      | 44               | 50               | 44               | 60               | 67               | 48               |
|                                                                             | Women | 47                      | 39               | 48               | 41               | 56               | 65               | 48               |
| None                                                                        | Men   | 10                      | 8                | 8                | 14               | 9                | 5                | 9                |
|                                                                             | Women | 8                       | 8                | 6                | 11               | 7                | 4                | 7                |
| Median BMI <sup>†4</sup>                                                    | Men   | 28.2 (24.6-32.6)        | 26.9 (23.7-31.0) | 26.9 (23.7-31.0) | 28.1 (24.6-32.4) | 27.7 (24.2-32.2) | 27.4 (24.4-31.2) | 26.2 (23.0-30.4) |
|                                                                             | Women | 28.0 (23.6-33.2)        | 26.4 (22.9-31.4) | 26.4 (23.0-31.4) | 28.0 (23.7-33.1) | 26.6 (22.4-32.0) | 26.7 (23.0-31.9) | 26.2 (22.0-31.1) |
| Diabetes <sup>†</sup> , % <sup>5</sup>                                      | Men   | 51                      | 100              | 100              | 21               | 11               | 8                | 16               |
|                                                                             | Women | 45                      | 100              | 100              | 21               | 9                | 7                | 13               |
| Mean number of cardiovascular comorbidities <sup>†*</sup> (SD) <sup>4</sup> | Men   | 0.33 ± 0.66             | 0.51 (0.79)      | 0.37 (0.70)      | 0.28 (0.58)      | 0.16 (0.44)      | 0.12 (0.39)      | 0.22 (0.55)      |
|                                                                             | Women | 0.25 ± 0.58             | 0.46 (0.74)      | 0.32 (0.64)      | 0.22 (0.51)      | 0.12 (0.39)      | 0.07 (0.30)      | 0.15 (0.46)      |
| COPD <sup>†</sup> , % <sup>6</sup>                                          | Men   | 2                       | 3                | 2                | 2                | 2                | 1                | 2                |
|                                                                             | Women | 2                       | 3                | 1                | 2                | 1                | 1                | 2                |
| Smoking <sup>†</sup> , % <sup>4</sup>                                       | Men   | 4                       | 3                | 5                | 5                | 5                | 4                | 5                |
|                                                                             | Women | 3                       | 3                | 4                | 4                | 3                | 3                | 4                |
| Cancer <sup>†</sup> , % <sup>7</sup>                                        | Men   | 3                       | 2                | 1                | 3                | 3                | 2                | 7                |
|                                                                             | Women | 3                       | 2                | 1                | 2                | 2                | 3                | 6                |
| Mean PRA %, (SD) <sup>4</sup>                                               | Men   | 6.5 (17.3)              | 6.3 (17.0)       | 5.9 (16.1)       | 7.0 (17.7)       | 6.0 (16.5)       | 5.7 (15.6)       | 7.5 (19.4)       |
|                                                                             | Women | 25.0 (35.5)             | 26.5 (36.4)      | 20.2 (32.9)      | 27.9 (36.8)      | 24.2 (34.8)      | 22.7 (33.9)      | 22.2 (34.1)      |

GN, glomerulonephritis; BMI, Body Mass Index; PRA, panel reactive antibody; IQR, interquartile range; SD standard deviation

<sup>1</sup> p<0.05 for men vs women among all waitlisted patients and for all causes of kidney failure except type 2 diabetes (p=0.4) and other (p=0.6)

<sup>2</sup> p<0.05 for men vs women among all waitlisted patients and for all causes of kidney failure except other (p=0.09)

<sup>3</sup> p<0.05 for men vs women among all waitlisted patients and for all causes of kidney failure except type 1 diabetes (p=0.2)

<sup>4</sup> p<0.05 for men vs women among all waitlisted patients and for all causes of kidney failure

<sup>5</sup> p<0.05 for men vs women among all waitlisted patients and for all non-diabetic causes of kidney failure

<sup>6</sup> p<0.05 for men vs women among all waitlisted patients and for GN, p=0.2 for type 2 diabetes, p=0.08 for type 1 diabetes, p=0.1 for hypertension, p=0.2 for cystic, p=0.9 for other

<sup>7</sup> p<0.05 for men vs women for all causes of kidney failure except type 2 diabetes (p=0.6), type 1 diabetes (0.6), and cystic (p=0.4)

† Ascertained at time of first KRT

\*Cardiovascular comorbidities defined as Coronary Artery Disease, Congestive Heart Failure, Stroke or Transient Ischemic Attack, and Peripheral Vascular Disease

**Supplemental Table 3:** Hazard of deceased donor transplantation from waitlisting by sex\*

|                                                                    | <b>Access to deceased donor transplantation from time of waitlisting</b> |
|--------------------------------------------------------------------|--------------------------------------------------------------------------|
| Outcomes occurring for men, N (% of outcomes occurring in men)     | 38,668 (63)                                                              |
| Outcomes occurring for women, N (% of outcomes occurring in women) | 22,839 (37)                                                              |
| <b>Overall models</b>                                              | <b>Women (vs Men)<br/>Hazard ratio (95% CI)</b>                          |
| Unadjusted model                                                   | 0.97 (0.95-0.99)                                                         |
| Minimally adjusted model <sup>†</sup> ( <b>Model 1</b> )           | 0.96 (0.95-0.98)                                                         |
| Fully adjusted model <sup>‡</sup> ( <b>Model 2</b> )               | 0.96 (0.94-0.98)                                                         |

\*Excludes preemptively waitlisted individuals due to lack of comorbid data at waitlisting.

<sup>†</sup>Adjusted for attributed cause of kidney failure, age at waitlisting, race/ethnicity, BMI, and panel reactive antibodies (PRA)

<sup>‡</sup>Adjusted for attributed cause of kidney failure, age at waitlisting, race/ethnicity, BMI, year of waitlisting, median zip code household income, insurance coverage, Organ Procurement and Transplant Network region, smoking, chronic obstructive pulmonary disease, cancer, coronary artery disease, congestive heart failure, stroke or transient ischemic attack, peripheral vascular disease, and PRA

**Supplemental Table 4:** Access to waitlist and deceased donor transplantation by sex after first kidney replacement therapy with competing risk of death and living donor kidney transplantation

| Overall Models                                                              | Women (vs Men)<br>Subhazard ratio (95% CI)                                                                |                                                                                                                       |                                                                                                                                              |
|-----------------------------------------------------------------------------|-----------------------------------------------------------------------------------------------------------|-----------------------------------------------------------------------------------------------------------------------|----------------------------------------------------------------------------------------------------------------------------------------------|
|                                                                             | Access to waitlist from time of first kidney failure treatment accounting for the competing risk of death | Access to deceased donor transplantation from time of first kidney failure accounting for the competing risk of death | Access to deceased donor transplantation from time of first kidney failure accounting for the competing risk of living donor transplantation |
| Unadjusted model                                                            | 0.80 (0.78-0.82) <sup>2</sup>                                                                             | 0.83 (0.79-0.86) <sup>2</sup>                                                                                         | 0.87 (0.82-0.93) <sup>1</sup>                                                                                                                |
| Minimally adjusted model (Model 1) <sup>†</sup>                             | 0.86 (0.84-0.88) <sup>2</sup>                                                                             | 0.90 (0.86-0.94) <sup>2</sup>                                                                                         | 0.90 (0.85-0.96) <sup>1</sup>                                                                                                                |
| Fully adjusted model (Model 2) <sup>*</sup>                                 | 0.89 (0.87-0.91) <sup>2</sup>                                                                             | 0.92 (0.88-0.96) <sup>2</sup>                                                                                         | 0.93 (0.89-0.97) <sup>1</sup>                                                                                                                |
| <b>Fully adjusted model (Model 2) stratified by cause of kidney failure</b> |                                                                                                           |                                                                                                                       |                                                                                                                                              |
| Type 2 Diabetes                                                             | 0.75 (0.73-0.78) <sup>3</sup>                                                                             | 0.71 (0.67-0.76) <sup>2</sup>                                                                                         | 0.75 (0.66-0.85) <sup>1</sup>                                                                                                                |
| Type 1 Diabetes                                                             | 0.95 (0.89-1.01) <sup>3</sup>                                                                             | 0.94 (0.85-1.04) <sup>2</sup>                                                                                         | 0.85 (0.70-1.04) <sup>1</sup>                                                                                                                |
| Hypertension                                                                | 0.89 (0.85-0.92) <sup>3</sup>                                                                             | 0.91 (0.86-0.98) <sup>2</sup>                                                                                         | 0.89 (0.78-1.02) <sup>1</sup>                                                                                                                |
| Cystic Disease                                                              | 1.06 (1.01-1.12) <sup>3</sup>                                                                             | 1.06 (0.95-1.18) <sup>2</sup>                                                                                         | 1.11 (0.96-1.29) <sup>2</sup>                                                                                                                |
| Glomerulonephritis                                                          | 0.92 (0.88-0.95) <sup>3</sup>                                                                             | 1.01 (0.95-1.09) <sup>2</sup>                                                                                         | 1.08 (0.94-1.24) <sup>1</sup>                                                                                                                |
| Other                                                                       | 1.12 (1.07-1.18) <sup>3</sup>                                                                             | 1.29 (1.19-1.41) <sup>2</sup>                                                                                         | 1.10 (0.92-1.32) <sup>1</sup>                                                                                                                |

<sup>1</sup> 5% data sample

<sup>2</sup> 10% data sample

<sup>3</sup> 20% data sample

<sup>†</sup>Adjusted for attributed cause of kidney failure, age, race/ethnicity, body mass index, and, for waitlisted patients

<sup>\*</sup>Adjusted for attributed cause of kidney failure, age, race/ethnicity, body mass index, year of first kidney failure treatment, median zip code household income, insurance coverage, Organ Procurement and Transplantation Network, smoking, chronic obstructive pulmonary disease, cancer, coronary artery disease, congestive heart failure, stroke or transient ischemic attack, peripheral vascular disease

**Supplemental Table 5:** Access to deceased donor transplantation after waitlisting by sex with competing risk of death and living donor kidney transplantation\*

| Overall Models                                                              | Women (vs Men)<br>Subhazard ratio (95% CI)                                                                   |                                                                                                                                     |
|-----------------------------------------------------------------------------|--------------------------------------------------------------------------------------------------------------|-------------------------------------------------------------------------------------------------------------------------------------|
|                                                                             | Access to deceased donor transplantation from time of waitlisting accounting for the competing risk of death | Access to deceased donor transplantation from time of waitlisting accounting for the competing risk of living donor transplantation |
| Unadjusted model                                                            | 0.92 (0.87-0.97) <sup>1</sup>                                                                                | 0.96 (0.93-0.99) <sup>1</sup>                                                                                                       |
| Minimally adjusted model (Model 1) <sup>†</sup>                             | 0.89 (0.84-0.94) <sup>1</sup>                                                                                | 0.88 (0.83-0.93) <sup>1</sup>                                                                                                       |
| Fully adjusted model (Model 2) <sup>‡</sup>                                 | 0.90 (0.85-0.95) <sup>1</sup>                                                                                | 0.89 (0.84-0.94) <sup>1</sup>                                                                                                       |
| <b>Fully adjusted model (Model 2) stratified by cause of kidney failure</b> |                                                                                                              |                                                                                                                                     |
| Type 2 Diabetes                                                             | 0.84 (0.78-0.90) <sup>2</sup>                                                                                | 0.83 (0.77-0.89) <sup>2</sup>                                                                                                       |
| Type 1 Diabetes                                                             | 0.92 (0.80-1.07) <sup>2</sup>                                                                                | 0.88 (0.76-1.02) <sup>2</sup>                                                                                                       |
| Hypertension                                                                | 1.04 (0.96-1.12) <sup>2</sup>                                                                                | 1.01 (0.93-1.10) <sup>2</sup>                                                                                                       |
| Cystic Disease                                                              | 1.04 (0.86-1.25) <sup>2</sup>                                                                                | 1.03 (0.85-1.23) <sup>2</sup>                                                                                                       |
| Glomerulonephritis                                                          | 0.98 (0.90-1.08) <sup>2</sup>                                                                                | 0.98 (0.89-1.07) <sup>2</sup>                                                                                                       |
| Other                                                                       | 0.93 (0.82-1.04) <sup>2</sup>                                                                                | 0.92 (0.81-1.03) <sup>2</sup>                                                                                                       |

\*Excludes preemptively waitlisted individuals due to lack of comorbid data at waitlisting.

<sup>1</sup> 10% data sample

<sup>2</sup> 20% data sample

<sup>†</sup>Adjusted for attributed cause of kidney failure, age at waitlisting, race/ethnicity, body mass index, and panel reactive antibodies (PRA)

<sup>‡</sup>Adjusted for attributed cause of kidney failure, age at waitlisting, race/ethnicity, body mass index, year of waitlisting, median zip code household income, insurance coverage, Organ Procurement and Transplantation Network, smoking, chronic obstructive pulmonary disease, cancer, coronary artery disease, congestive heart failure, stroke or transient ischemic attack, peripheral vascular disease, and PRA

**Supplemental Table 6:** Hazard of waitlisting and deceased donor transplantation after first kidney replacement therapy by sex, age, and attributed cause of kidney failure

| Overall models                                                                                  | Women (vs Men)<br>Hazard ratio (95% CI)                              |                                                                                               |
|-------------------------------------------------------------------------------------------------|----------------------------------------------------------------------|-----------------------------------------------------------------------------------------------|
|                                                                                                 | Access to waitlist from<br>time of first kidney failure<br>treatment | Access to deceased<br>donor transplantation<br>from time of first kidney<br>failure treatment |
| Fully adjusted model*<br>(Model 2)                                                              |                                                                      |                                                                                               |
| Age <65 years                                                                                   | 0.94 (0.93-0.95)                                                     | 0.98 (0.96-0.99)                                                                              |
| Age ≥65 years                                                                                   | 0.68 (0.67-0.69)                                                     | 0.75 (0.72-0.77)                                                                              |
| <b>Fully adjusted model<br/>(Model 2) stratified by<br/>cause of kidney failure<br/>and age</b> |                                                                      |                                                                                               |
| Type 2 Diabetes                                                                                 |                                                                      |                                                                                               |
| Age <65 years                                                                                   | 0.77 (0.76-0.78)                                                     | 0.76 (0.74-0.79)                                                                              |
| Age ≥65 years                                                                                   | 0.55 (0.53-0.57)                                                     | 0.54 (0.50-0.58)                                                                              |
| Type 1 Diabetes                                                                                 |                                                                      |                                                                                               |
| Age <65 years                                                                                   | 1.01 (0.98-1.04)                                                     | 1.00 (0.95-1.04)                                                                              |
| Age ≥65 years                                                                                   | 0.63 (0.55-0.72)                                                     | 0.75 (0.57-0.98)                                                                              |
| Hypertension                                                                                    |                                                                      |                                                                                               |
| Age < 65 years                                                                                  | 0.95 (0.93-0.97)                                                     | 0.98 (0.95-1.01)                                                                              |
| Age ≥ 65 years                                                                                  | 0.70 (0.67-0.72)                                                     | 0.75 (0.70-0.80)                                                                              |
| Cystic disease                                                                                  |                                                                      |                                                                                               |
| Age < 65 years                                                                                  | 1.06 (1.03-1.10)                                                     | 1.19 (1.13-1.25)                                                                              |
| Age ≥ 65 years                                                                                  | 1.05 (0.97-1.13)                                                     | 1.16 (1.02-1.32)                                                                              |
| Glomerulonephritis                                                                              |                                                                      |                                                                                               |
| Age < 65 years                                                                                  | 0.99 (0.97-1.01)                                                     | 1.02 (0.99-1.05)                                                                              |
| Age ≥ 65 years                                                                                  | 0.72 (0.68-0.77)                                                     | 0.84 (0.76-0.93)                                                                              |
| Other                                                                                           |                                                                      |                                                                                               |
| Age < 65 years                                                                                  | 1.18 (1.15-1.21)                                                     | 1.19 (1.16-1.23)                                                                              |
| Age ≥ 65 years                                                                                  | 0.90 (0.86-0.95)                                                     | 0.96 (0.89-1.03)                                                                              |

\*Adjusted for attributed cause of kidney failure, race/ethnicity, BMI, year of first kidney failure treatment, median zip code household income, insurance coverage, Organ Procurement and Transplant Network region, smoking, chronic obstructive pulmonary disease, cancer, coronary artery disease, congestive heart failure, stroke or transient ischemic attack, peripheral vascular disease

**Supplemental Table 7:** Hazard of waitlisting and deceased donor transplantation by sex after first maintenance kidney replacement therapy excluding those placed on waitlist before first maintenance kidney replacement therapy

|                                                                             | <b>Women (vs Men)</b><br>Hazard ratio (95% CI)                        |                                                                                             |
|-----------------------------------------------------------------------------|-----------------------------------------------------------------------|---------------------------------------------------------------------------------------------|
| <b>Overall models</b>                                                       | <b>Access to waitlist from time of first kidney failure treatment</b> | <b>Access to deceased donor transplantation from time of first kidney failure treatment</b> |
| Unadjusted Model                                                            | 0.74 (0.74-0.75)                                                      | 0.76 (0.75-0.77)                                                                            |
| Minimally adjusted model <sup>†</sup><br><b>(Model 1)</b>                   | 0.81 (0.80-0.82)                                                      | 0.84 (0.83-0.85)                                                                            |
| Fully adjusted model <sup>*</sup><br><b>(Model 2)</b>                       | 0.83 (0.82-0.84)                                                      | 0.86 (0.84-0.87)                                                                            |
| <b>Fully adjusted model (Model 2) stratified by cause of kidney failure</b> |                                                                       |                                                                                             |
| Type 2 Diabetes                                                             | 0.71 (0.70-0.72)                                                      | 0.70 (0.67-0.72)                                                                            |
| Type 1 Diabetes                                                             | 0.88 (0.85-0.91)                                                      | 0.86 (0.81-0.91)                                                                            |
| Hypertension                                                                | 0.85 (0.84-0.87)                                                      | 0.89 (0.86-0.92)                                                                            |
| Cystic disease                                                              | 0.96 (0.91-1.00)                                                      | 1.02 (0.95-1.10)                                                                            |
| Glomerulonephritis                                                          | 0.92 (0.90-0.94)                                                      | 0.94 (0.91-0.98)                                                                            |
| Other                                                                       | 1.03 (1.00-1.06)                                                      | 1.09 (1.03-1.14)                                                                            |

<sup>†</sup>Adjusted for attributed cause of kidney failure, age, race/ethnicity, and BMI

<sup>\*</sup>Adjusted for attributed cause of kidney failure, age, race/ethnicity, BMI, year of first kidney failure treatment, median zip code household income, insurance coverage, Organ Procurement and Transplant Network region, smoking, chronic obstructive pulmonary disease, cancer, coronary artery disease, congestive heart failure, stroke or transient ischemic attack, and peripheral vascular disease
